# Supplementary material for: Alert‐Triggered Patient Education Versus Nurse Feedback for Nonadministered Venous Thromboembolism Prophylaxis Doses: A Cluster‐Randomized Controlled Trial
Source: PubMed Central journal article supplement — J Am Heart Assoc. 2022 Sep 1;11(18):e027119. doi: 10.1161/JAHA.122.027119 (PMC9683644; doi:10.1161/jaha.122.027119), 2022-09-01
Supplement: JAH3-11-e027119-s001.pdf [file JAH3-11-e027119-s001.pdf]

# **SUPPLEMENTAL MATERIAL**

**Figure S1. Sample of Monthly Scorecard Received by Nurse Leaders on Nurse Feedback Units**

| Rank               | Unique Identifier | CURRENT MONTH              |                         |                   |                    | Previous Month          |
|--------------------|-------------------|----------------------------|-------------------------|-------------------|--------------------|-------------------------|
|                    |                   | Number of Doses Prescribed | Proportion Administered | Proportion missed | Proportion Refused | Proportion Administered |
| 1                  | Nurse A           | 50                         | 100%                    | 0.0%              | 0.0%               | 100%                    |
| 2                  | Nurse B           | 45                         | 100%                    | 0.0%              | 0.0%               | 100%                    |
| 3                  | Nurse C           | 40                         | 100%                    | 0.0%              | 0.0%               | 100%                    |
| 4                  | Nurse D           | 35                         | 100%                    | 0.0%              | 0.0%               | 94.0%                   |
| 5                  | Nurse E           | 30                         | 100%                    | 0.0%              | 0.0%               | 91.0%                   |
| 6                  | Nurse F           | 20                         | 100%                    | 0.0%              | 0.0%               | 93.0%                   |
| 7                  | Nurse G           | 20                         | 95.0%                   | 0.0%              | 5.0%               | 92.0%                   |
| 8                  | Nurse H           | 50                         | 94.0%                   | 2.0%              | 4.0%               | 81.0%                   |
| 9                  | Nurse I           | 40                         | 90.0%                   | 5.0%              | 5.0%               | 80.0%                   |
| 10                 | Nurse J           | 25                         | 92.0%                   | 0.0%              | 8.0%               | 82.0%                   |
| 11                 | Nurse K           | 25                         | 88.0%                   | 8.0%              | 4.0%               | 80.0%                   |
| 12                 | Nurse L           | 20                         | 85.0%                   | 0.0%              | 15.0%              | 79.0%                   |
| Overall Unit       |                   | 400                        | 95.3%                   | 1.3%              | 3.4%               | 89.0%                   |
| Overall Department |                   | 3000                       | 89.0%                   | 3.7%              | 7.3%               | 88.0%                   |

A monthly scorecard of venous thromboembolism (VTE) prophylaxis administration was given to the nurse leader on each unit participating in the nurse feedback arm. The scorecard reflected individual nurse and unit-level administration practices. Data included the number of doses prescribed and the proportions administered, missed, and refused. Nurses were ranked according to the percentage of doses not administered and performance color-coded based on reaching a 96% goal. We used the 96% goal because leaders of The Johns Hopkins Hospital and the health system established this as the common goal for quality improvement efforts aimed at externally reported core measures. Thus, it was a goal familiar to many frontline staff and unit leaders. Performance on administration is coded green when  $\geq 96\%$ , yellow when between 90.0%-95.9%, and red when  $<90.0\%$ . Nursing leaders provided peer coaching to nurses who performed below 96% administration, or in the yellow and red zones.
